# Supplementary material for: pH-regulated hydrothermal synthesis and characterization of Sb4O5X2 (X = Br/Cl) and its use for the dye degradation of methyl orange both with and without light illumination
Source: Royal Society of Chemistry journal article supplement (doi:10.1039/d2ra01215d), 2022-01-01
Supplement: d2ra01215d1.pdf [file d2ra01215d1.pdf]

## pH-regulated hydrothermal synthesis, characterization of $\text{Sb}_4\text{O}_5\text{X}_2$ (X=Br / Cl) and its use for the dye degradation of methyl orange both with and without light illumination

Sayantani Paul<sup>a</sup>, Bibaswan Sen<sup>a</sup>, Nirman Chakraborty<sup>b</sup>, Sangita Das<sup>a</sup>, Swastik Mondal<sup>b</sup>, Asoke P. Chattopadhyay<sup>a</sup>, Sk Imran Ali<sup>a\*</sup>

a. Department of Chemistry, University of Kalyani, Nadia, West Bengal, India

b. CSIR-Central Glass and Ceramic Research Institute, Jadavpur, Kolkata, West Bengal India.

Table S1. Bond Valence Sum Calculations for  $\text{Sb}_4\text{O}_5\text{Cl}_2$  and  $\text{Sb}_4\text{O}_5\text{Br}_2$  employing  $R_0(\text{Sb}-\text{O}) = 1.973\text{Å}$ ,  $R_0(\text{Sb}-\text{Br}) = 2.50\text{Å}$ ,  $R_0(\text{Sb}-\text{Cl}) = 2.35\text{Å}$

| ATOMS | BVS | ATOMS | BVS |
|-------|-----|-------|-----|
| Sb1   | 2.5 | Sb1   | 2.6 |
| Sb2   | 2.9 | Sb2   | 2.7 |
| Br    | 0.7 | Cl    | 0.6 |

Table S2:  $\lambda_{\text{max}}$ (nm) and band gap(eV) at different pH in aqueous solution:

| pH | $\lambda_{\text{max}}$ for $\text{Sb}_4\text{O}_5\text{Cl}_2$ (nm) | $\lambda_{\text{max}}$ for $\text{Sb}_4\text{O}_5\text{Br}_2$ (nm) | $E_g$ for $\text{Sb}_4\text{O}_5\text{Cl}_2$ (eV) | $E_g$ for $\text{Sb}_4\text{O}_5\text{Br}_2$ (eV) |
|----|--------------------------------------------------------------------|--------------------------------------------------------------------|---------------------------------------------------|---------------------------------------------------|
| 2  | 322                                                                | 274.7                                                              | 3.48                                              | 3.39                                              |
| 3  | 322                                                                | 269.7                                                              | 3.4                                               | 3.47                                              |
| 4  | 322                                                                | 262.3                                                              | 3.4                                               | 3.47                                              |
| 5  | 322                                                                | 274.0                                                              | 3.4                                               | 3.46                                              |
| 6  | 322                                                                | 269.0                                                              | 3.45                                              | 3.47                                              |

**Table S3:  $\lambda_{\max}$ (nm) and band gap (eV) at different pH in dye solution :**

| pH | $\lambda_{\max}$ for $\text{Sb}_4\text{O}_5\text{Cl}_2$ (nm) | $\lambda_{\max}$ for $\text{Sb}_4\text{O}_5\text{Br}_2$ (nm) | $E_g$ for $\text{Sb}_4\text{O}_5\text{Cl}_2$ (eV) | $E_g$ for $\text{Sb}_4\text{O}_5\text{Br}_2$ (eV) |
|----|--------------------------------------------------------------|--------------------------------------------------------------|---------------------------------------------------|---------------------------------------------------|
| 2  | 496                                                          | 462.9                                                        | 2.215                                             | 2.37                                              |
| 3  | 462.4                                                        | 489.5                                                        | 2.356                                             | 2.30                                              |
| 4  | 476                                                          | 471                                                          | 2.247                                             | 2.20                                              |
| 5  | 500                                                          | 462.5                                                        | 2.198                                             | 2.376                                             |
| 6  | 496                                                          | 502.7                                                        | 2.215                                             | 2.22                                              |

**Table S4: Shape and size of antimony oxybromide and antimony oxychloride :**

| pH | For $\text{Sb}_4\text{O}_5\text{Br}_2$   |                          | For $\text{Sb}_4\text{O}_5\text{Cl}_2$ |                          |
|----|------------------------------------------|--------------------------|----------------------------------------|--------------------------|
|    | Shape                                    | Area ( $\mu\text{m}^2$ ) | Shape                                  | Area ( $\mu\text{m}^2$ ) |
| 2  | Needle shaped                            | 6.95×0.8                 | 3D Sheet                               | 24.75×15.40              |
| 3  | Needle shaped                            | 6.34×10.504              | 3D Sheet                               | 14.375×6.075             |
| 4  | Both needle and hexagonal shaped cluster | 8.078× 7.09              | 3D Sheet                               | 20.83×10.74              |
| 5  | Hexagonal shaped cluster                 | 4.669×3.748              | 3D Sheet                               | 15.98×7.114              |
| 6  | Hexagonal shaped cluster                 | 17.244×0.458             | 3D Sheet                               | 6.005×4.922              |

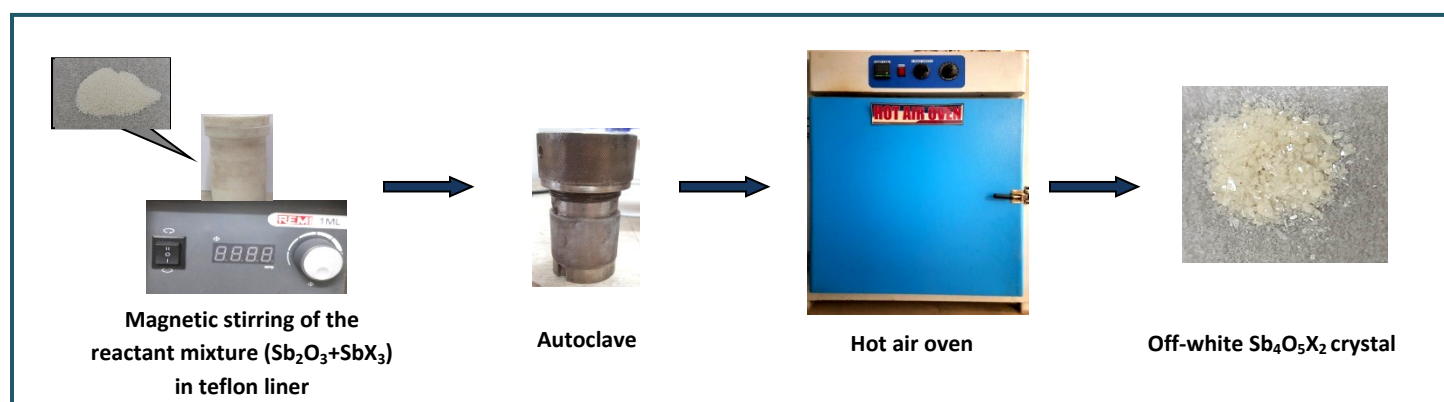

**Fig S1: Schematic representation of experimental procedure of  $\text{Sb}_4\text{O}_5\text{X}_2$  compounds**

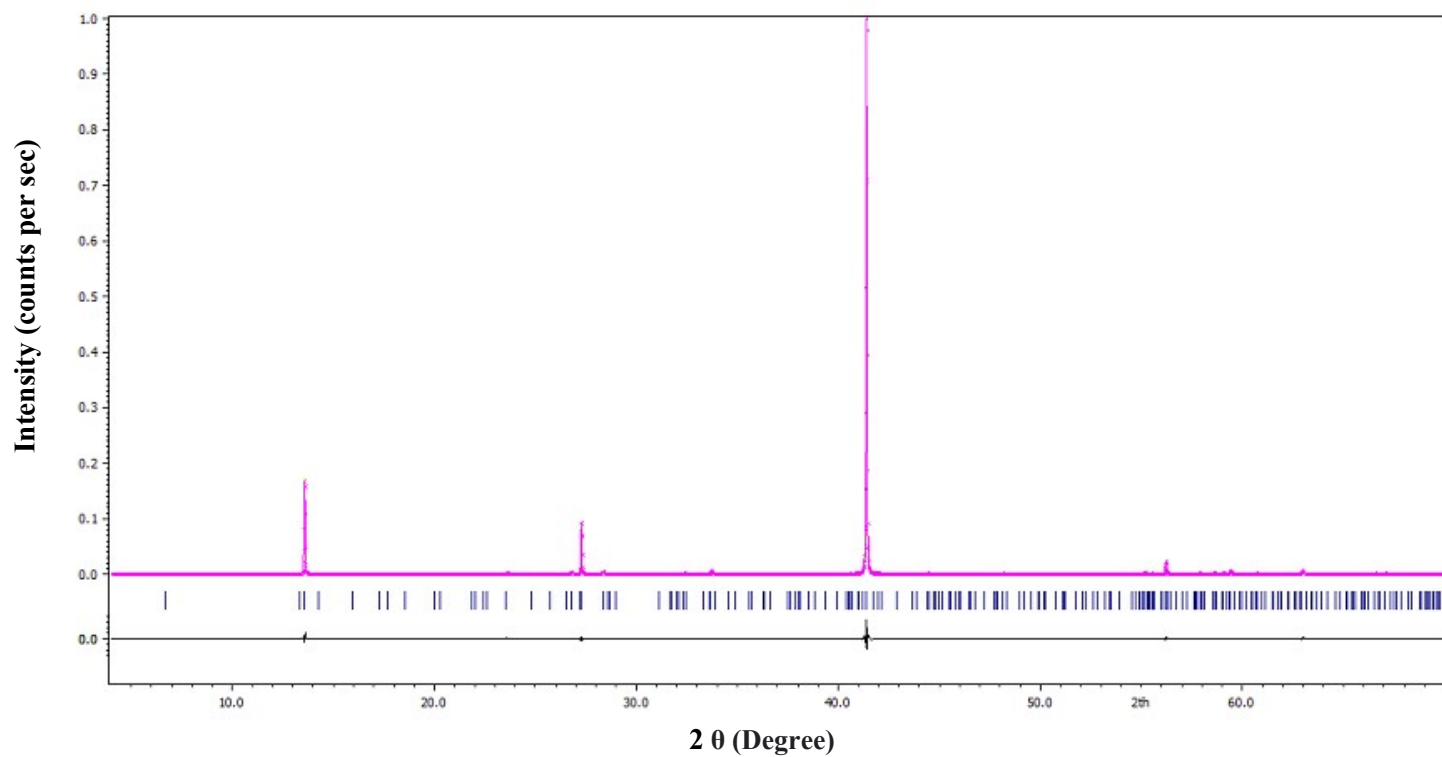

Fig S2: PXRD graph for  $\text{Sb}_4\text{O}_5\text{Br}_2$

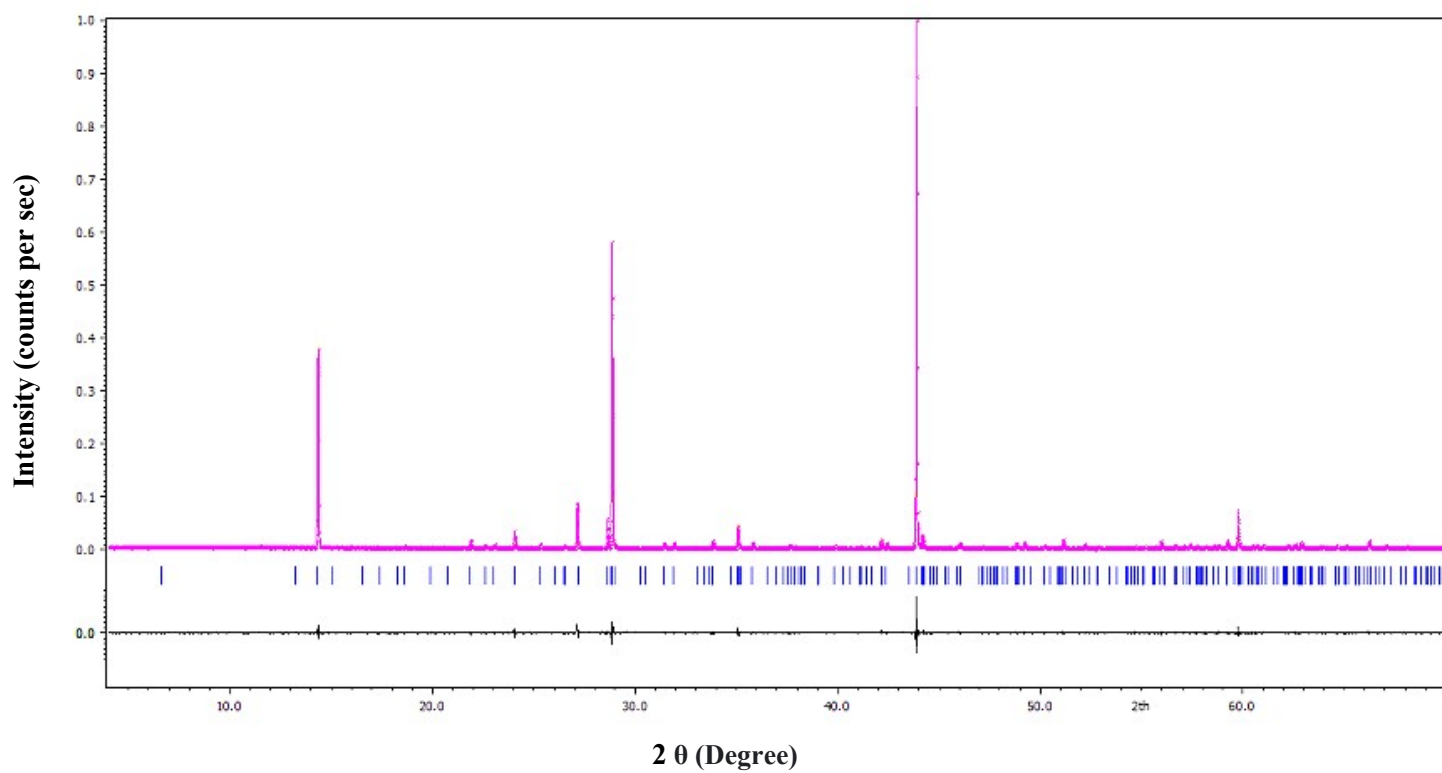

Fig S3: PXRD graph for  $\text{Sb}_4\text{O}_5\text{Cl}_2$
